# Supplementary material
Source: PubMed Central journal article supplement (PMC5481977)
Supplement: DC162203SupplementaryData.pdf [file DC162203SupplementaryData.pdf]

SUPPLEMENTARY DATA

**Supplementary Table 1.** Counts (%) of the baseline cohort vital status at subsequent visits

|                      | Baseline<br>(1990-1992) | Visit 4<br>(1996-1998) | Visit 5<br>(2011-2013) |
|----------------------|-------------------------|------------------------|------------------------|
| Visit Status         |                         |                        |                        |
| Attended             | 12,996 (100)            | 10,461 (80.5)          | 5,898 (45.4)           |
| Alive did not attend | 0                       | 2,972 (22.9)           | 3,441 (26.5)           |
| Deceased by visit    | 0                       | 437 (3.4)              | 3,657 (28.1)           |

Values shown as counts (%), where % is of the original baseline cohort.

SUPPLEMENTARY DATA

**Supplementary Table 2.** Baseline\* participant characteristics by vital status at visit 5

|                                    | Attended visit 5 |       | Alive but did not attend visit 5 |       | Deceased by visit 5 |       |
|------------------------------------|------------------|-------|----------------------------------|-------|---------------------|-------|
|                                    | ≥10              | <10   | ≥10                              | <10   | ≥10                 | <10   |
| 1,5-AG, µg/mL                      |                  |       |                                  |       |                     |       |
| N (%)                              |                  |       |                                  |       |                     |       |
| Age, years                         | 55.0             | 55.1  | 57.2                             | 57.8  | 59.6                | 59.8  |
| Female, %                          | 59.3             | 64.4  | 61.0                             | 66.9  | 44.1                | 52.4  |
| Black, %                           | 20.8             | 36.2  | 21.0                             | 34.9  | 25.4                | 42.6  |
| Measures of glycemia               |                  |       |                                  |       |                     |       |
| 1,5-AG, µg/mL                      | 19.1             | 5.8   | 19.5                             | 5.4   | 19.8                | 4.4   |
| Fasting glucose, mg/dl             | 102.8            | 157.0 | 104.7                            | 172.0 | 107.5               | 209.7 |
| HbA1c, %                           | 5.4              | 7.1   | 5.5                              | 7.4   | 5.6                 | 8.5   |
| HbA1c, mmol/mol                    | 35.8             | 53.8  | 36.6                             | 57.8  | 38.0                | 69.9  |
| Body mass index, kg/m <sup>2</sup> | 27.5             | 28.9  | 27.9                             | 30.2  | 27.9                | 30.4  |
| Diabetes, %                        | 3.7              | 46.0  | 6.6                              | 58.9  | 10.7                | 78.1  |
| Hypertension, %                    | 26.5             | 34.7  | 34.9                             | 45.7  | 45.6                | 62.3  |
| eGFR, mL/min/1.73 m <sup>2</sup>   | 97.9             | 100.4 | 96.5                             | 99.8  | 93.8                | 90.4  |
| Incident events after baseline     |                  |       |                                  |       |                     |       |
| Dementia, %                        | 5.1              | 8.3   | 14.4                             | 21.2  | 12.2                | 14.0  |
| Stroke, %                          | 4.1              | 5.7   | 7.5                              | 11.4  | 11.9                | 23.2  |
| Myocardial infarction, %           | 7.3              | 11.2  | 10.0                             | 16.9  | 16.1                | 26.4  |
| Chronic kidney disease†, %         | 28.9             | 44.7  | 17.0                             | 28.9  | 23.1                | 45.3  |
| End-stage renal disease, %         | 0.6              | 2.6   | 1.2                              | 2.9   | 3.0                 | 15.5  |
| Global Z score                     | 0.25             | 0.04  | 0.00                             | -0.22 | -0.30               | -0.64 |

\* Values shown are measured at baseline except for “incident events after baseline”

† CKD was defined in persons with eGFR >60 mL/min/1.73 m<sup>2</sup> at baseline as eGFR <60 mL/min/1.73 m<sup>2</sup> and a 25% or greater decrease in GFR from baseline or kidney disease-related hospitalization based on cohort surveillance.

SUPPLEMENTARY DATA

**Supplementary Table 3.** Mean (SD) and change in cognitive function across study visits by dementia status during follow-up

|                 | Dementia during follow-up | No Dementia during follow-up |
|-----------------|---------------------------|------------------------------|
| Visit 2         | -0.43 (1.06)              | 0.04 (0.98)                  |
| Visit 4         | -0.61 (1.08)              | 0.02 (0.96)                  |
| Visit 5         | -2.29 (0.95)              | -0.52 (0.95)                 |
| Change: v4 - v2 | -0.30 (0.68)              | -0.12 (0.58)                 |
| Change: v5 - v4 | -2.01 (0.98)              | -0.74 (0.69)                 |

Abbreviations: SD, standard deviation; v4, visit 4; v2, visit 2.

SUPPLEMENTARY DATA

**Supplementary Table 4.** Adjusted HRs (95% CI) for the association of 1,5-anhydroglucitol categories with incident dementia – stratified analyses by diabetes and HbA1c category

|                             |                     | Events/N            | Model 1<br>HR (95% CI) | p-<br>value <sup>†</sup> | Model 2<br>HR (95% CI) | p-<br>value <sup>†</sup> |
|-----------------------------|---------------------|---------------------|------------------------|--------------------------|------------------------|--------------------------|
| No<br>Diabetes              | 1,5-AG ≥10<br>µg/mL | 829/10708<br>(7.7%) | 1 (reference)          | 0.959                    | 1 (reference)          | 0.717                    |
|                             | 1,5-AG <10<br>µg/mL | 48/576<br>(8.3%)    | 1.01 (0.75,<br>1.35)   |                          | 1.06 (0.79,<br>1.42)   |                          |
| Diabetes*<br>HbA1c <<br>7%‡ | 1,5-AG ≥10<br>µg/mL | 60/535<br>(11.2%)   | 1 (reference)          | 0.400                    | 1 (reference)          | 0.202                    |
|                             | 1,5-AG <10<br>µg/mL | 19/125<br>(15.2%)   | 1.26 (0.74,<br>2.15)   |                          | 1.45 (0.82,<br>2.56)   |                          |
| HbA1c ≥<br>7%‡              | 1,5-AG ≥10<br>µg/mL | 19/176<br>(10.8%)   | 1 (reference)          | 0.035                    | 1 (reference)          | 0.110                    |
|                             | 1,5-AG <10<br>µg/mL | 130/876<br>(14.8%)  | 1.68 (1.04,<br>2.73)   |                          | 1.53 (0.91,<br>2.58)   |                          |

Abbreviations: HR, hazard ratio; CI, confidence interval; HbA1c, hemoglobin A1c; 1,5-AG, 1,5-anhydroglucitol. HRs and CIs were estimated using Cox proportional hazards regression over a median follow-up of 21 years.

Model 1: Adjusted for age, sex, education, and race-center

Model 2: Adjusted for the variables in model 1 plus hypertension, history of stroke, history of coronary heart disease, cigarette smoking status, drinking status, APOE4, and HbA1c

\* Diabetes was defined as a self-reported physician diagnosis of diabetes, use of glucose lowering medication, or an HbA1c ≥ 6.5% (48 mmol/mol)

† p-value for test of the difference in HR between 1,5-AG ≥10 µg/mL to 1,5-AG <10 µg/mL within diabetes status and HbA1c category

‡ Equivalent to HbA1c of 53 mmol/mol

SUPPLEMENTARY DATA

**Supplementary Table 5.** Adjusted HRs (95% CI) for the association of 1,5-anhydroglucitol categories with incident dementia by diabetes status among ARIC participants with at least one hospitalization, N=10,646

|                |                     | Events/N           | Model 1<br>HR (95% CI) | p-<br>value <sup>†</sup> | Model 2<br>HR (95% CI) | p-<br>value <sup>†</sup> |
|----------------|---------------------|--------------------|------------------------|--------------------------|------------------------|--------------------------|
| No<br>Diabetes | 1,5-AG ≥10<br>µg/mL | 792/8589<br>(9.2%) | 1 (reference)          | 0.793                    | 1 (reference)          | 0.567                    |
|                | 1,5-AG <10<br>µg/mL | 44/473<br>(9.3%)   | 1.05 (0.73,<br>1.51)   |                          | 1.11 (0.77,<br>1.60)   |                          |
| Diabetes*      | 1,5-AG ≥10<br>µg/mL | 57/483<br>(11.8%)  | 1.33 (0.96,<br>1.83)   | 0.881                    | 1.28 (0.92,<br>1.78)   | 0.730                    |
|                | 1,5-AG <10<br>µg/mL | 19/119<br>(16.0%)  | 1.39 (0.80,<br>2.43)   |                          | 1.43 (0.82,<br>2.51)   |                          |
| HbA1c ≥<br>7%‡ | 1,5-AG ≥10<br>µg/mL | 19/159<br>(11.9%)  | 1.48 (0.85,<br>2.57)   | 0.227                    | 1.29 (0.72,<br>2.32)   | 0.122                    |
|                | 1,5-AG <10<br>µg/mL | 125/823<br>(15.2%) | 2.11 (1.69,<br>2.63)   |                          | 2.08 (1.36,<br>3.19)   |                          |

Abbreviations: HR, hazard ratio; CI, confidence interval; HbA1c, hemoglobin A1c; 1,5-AG, 1,5-anhydroglucitol. HRs and CIs were estimated using Cox proportional hazards regression over a median follow-up of 21 years.

Model 1: Adjusted for age, sex, education, and race-center

Model 2: Adjusted for the variables in model 1 plus hypertension, history of stroke, history of coronary heart disease, cigarette smoking status, drinking status, and APOE4

\* Diabetes was defined as a self-reported physician diagnosis of diabetes, use of glucose lowering medication, or an HbA1c ≥ 6.5% (48 mmol/mol)

† p-value for test of the difference in HR between 1,5-AG ≥10 µg/mL to 1,5-AG <10 µg/mL within diabetes status and HbA1c category

‡ Equivalent to HbA1c of 53 mmol/mol

SUPPLEMENTARY DATA

**Supplementary Table 6.** Adjusted HRs (95% CI) for the association of 1,5-anhydroglucitol categories with incident dementia by diabetes status among ARIC participants – stratified analysis by sex

|                          |                  | Female          |                   |                      | Male            |                   |                      |
|--------------------------|------------------|-----------------|-------------------|----------------------|-----------------|-------------------|----------------------|
|                          |                  | Events/N        | HR (95% CI)       | p-value <sup>†</sup> | Events/N        | HR (95% CI)       | p-value <sup>†</sup> |
| No Diabetes              | 1,5-AG ≥10 µg/mL | 481/5950 (8.1%) | 1 (reference)     | 0.973                | 348/4758 (7.3%) | 1 (reference)     | 0.604                |
|                          | 1,5-AG <10 µg/mL | 31/378 (8.2%)   | 0.99 (0.69, 1.43) |                      | 17/198 (8.6%)   | 1.14 (0.70, 1.86) |                      |
| Diabetes*<br>HbA1c < 7%‡ | 1,5-AG ≥10 µg/mL | 37/311 (11.9%)  | 1.17 (0.83, 1.66) | 0.375                | 23/224 (10.3%)  | 1.61 (1.05, 2.47) | 0.889                |
|                          | 1,5-AG <10 µg/mL | 9/60 (15.0%)    | 1.64 (0.84, 3.18) |                      | 10/65 (15.4%)   | 1.70 (0.90, 3.21) |                      |
| HbA1c ≥ 7%‡              | 1,5-AG ≥10 µg/mL | 12/117 (10.3%)  | 1.11 (0.62, 1.98) | 0.029                | 7/59 (11.9%)    | 1.59 (0.74, 3.40) | 0.163                |
|                          | 1,5-AG <10 µg/mL | 56/501 (11.2%)  | 2.19 (1.69, 2.84) |                      | 54/375 (14.4%)  | 2.79 (2.08, 3.76) |                      |

Abbreviations: HR, hazard ratio; CI, confidence interval; HbA1c, hemoglobin A1c; 1,5-AG, 1,5-anhydroglucitol. HRs and CIs were estimated using Cox proportional hazards regression over a median follow-up of 21 years.

Models were adjusted for age, education, race-center, hypertension, history of stroke, history of coronary heart disease, cigarette smoking status, drinking status, and APOE4

\* Diabetes was defined as a self-reported physician diagnosis of diabetes, use of glucose lowering medication, or an HbA1c ≥ 6.5% (48 mmol/mol)

† p-value for test of the difference in HR between 1,5-AG ≥10 µg/mL to 1,5-AG <10 µg/mL within diabetes status and HbA1c category

‡ Equivalent to HbA1c of 53 mmol/mol

SUPPLEMENTARY DATA

**Supplementary Table 7.** Adjusted HRs (95% CI) for the association of 1,5-anhydroglucitol categories with incident dementia by diabetes status among ARIC participants – stratified analysis by race

|                          |                  | Black            |                   |                      | White           |                   |                      |
|--------------------------|------------------|------------------|-------------------|----------------------|-----------------|-------------------|----------------------|
|                          |                  | Events/N         | HR (95% CI)       | p-value <sup>†</sup> | Events/N        | HR (95% CI)       | p-value <sup>†</sup> |
| No Diabetes              | 1,5-AG ≥10 µg/mL | 225/2180 (10.3%) | 1 (reference)     | 0.168                | 604/8528 (7.1%) | 1 (reference)     | 0.524                |
|                          | 1,5-AG <10 µg/mL | 18/148 (12.2%)   | 1.41 (0.87, 2.29) |                      | 30/428 (7.0%)   | 0.89 (0.61, 1.28) |                      |
| Diabetes*<br>HbA1c < 7%‡ | 1,5-AG ≥10 µg/mL | 27/232 (11.6%)   | 1.12 (0.74, 1.70) | 0.953                | 33/303 (10.9%)  | 1.47 (1.03, 2.10) | 0.231                |
|                          | 1,5-AG <10 µg/mL | 5/41 (12.2%)     | 1.09 (0.45, 2.67) |                      | 14/84 (16.7%)   | 2.16 (1.27, 3.69) |                      |
| HbA1c ≥ 7%‡              | 1,5-AG ≥10 µg/mL | 12/102 (11.8%)   | 1.26 (0.70, 2.27) | 0.045                | 7/74 (9.5%)     | 1.52 (0.72, 3.22) | 0.202                |
|                          | 1,5-AG <10 µg/mL | 74/421 (17.6%)   | 2.36 (1.80, 3.10) |                      | 56/455 (12.3%)  | 2.54 (1.91, 3.37) |                      |

Abbreviations: HR, hazard ratio; CI, confidence interval; HbA1c, hemoglobin A1c; 1,5-AG, 1,5-anhydroglucitol. HRs and CIs were estimated using Cox proportional hazards regression over a median follow-up of 21 years.

Models were adjusted for age, education, race-center, hypertension, history of stroke, history of coronary heart disease, cigarette smoking status, drinking status, and APOE4

\* Diabetes was defined as a self-reported physician diagnosis of diabetes, use of glucose lowering medication, or an HbA1c ≥ 6.5% (48 mmol/mol)

† p-value for test of the difference in HR between 1,5-AG ≥10 µg/mL to 1,5-AG <10 µg/mL within diabetes status and HbA1c category

‡ Equivalent to HbA1c of 53 mmol/mol

SUPPLEMENTARY DATA

**Supplementary Table 8.** Adjusted HRs (95% CI) for the association of 1,5-anhydroglucitol categories with incident dementia by diabetes status among ARIC participants – stratified analysis by presence of APOE e4 alleles

|                          |                  | 0 APOE e4 alleles |                   |                      | 1 or 2 APOE e4 alleles |                   |                      |
|--------------------------|------------------|-------------------|-------------------|----------------------|------------------------|-------------------|----------------------|
|                          |                  | Events/N          | HR (95% CI)       | p-value <sup>†</sup> | Events/N               | HR (95% CI)       | p-value <sup>†</sup> |
| No Diabetes              | 1,5-AG ≥10 µg/mL | 438/7103 (5.8%)   | 1 (reference)     | 0.927                | 391/2779 (12.3%)       | 1 (reference)     | 0.829                |
|                          | 1,5-AG <10 µg/mL | 25/363 (6.4%)     | 1.05 (0.70, 1.57) |                      | 24/165 (12.7%)         | 1.06 (0.69, 1.61) |                      |
| Diabetes*<br>HbA1c < 7%‡ | 1,5-AG ≥10 µg/mL | 42/335 (11.1%)    | 1.86 (1.34, 2.57) | 0.548                | 18/141 (11.3%)         | 0.76 (0.46, 1.24) | 0.067                |
|                          | 1,5-AG <10 µg/mL | 8/84 (8.7%)       | 1.33 (0.66, 2.71) |                      | 11/22 (33.3%)          | 2.02 (1.10, 3.71) |                      |
| HbA1c ≥ 7%‡              | 1,5-AG ≥10 µg/mL | 6/109 (5.22%)     | 0.97 (0.43, 2.18) | 0.067                | 12/48 (21.3%)          | 1.57 (0.89, 2.77) | 0.879                |
|                          | 1,5-AG <10 µg/mL | 81/547 (12.9%)    | 2.43 (1.83, 3.24) |                      | 49/199 (19.8%)         | 2.02 (1.41, 2.90) |                      |

Abbreviations: HR, hazard ratio; CI, confidence interval; HbA1c, hemoglobin A1c; 1,5-AG, 1,5-anhydroglucitol. HRs and CIs were estimated using Cox proportional hazards regression over a median follow-up of 21 years.

Models were adjusted for age, education, race-center, hypertension, history of stroke, history of coronary heart disease, cigarette smoking status, drinking status, and APOE4

\* Diabetes was defined as a self-reported physician diagnosis of diabetes, use of glucose lowering medication, or an HbA1c ≥ 6.5% (48 mmol/mol)

† p-value for test of the difference in HR between 1,5-AG ≥10 µg/mL to 1,5-AG <10 µg/mL within diabetes status and HbA1c category

‡ Equivalent to HbA1c of 53 mmol/mol
